# Supplementary material for: Salmonella modulates metabolism during growth under conditions that induce expression of virulence genes
Source: Royal Society of Chemistry journal article supplement (doi:10.1039/c3mb25598k), 2013-03-22
Supplement: c3mb25598k.pdf [file c3mb25598k.pdf]

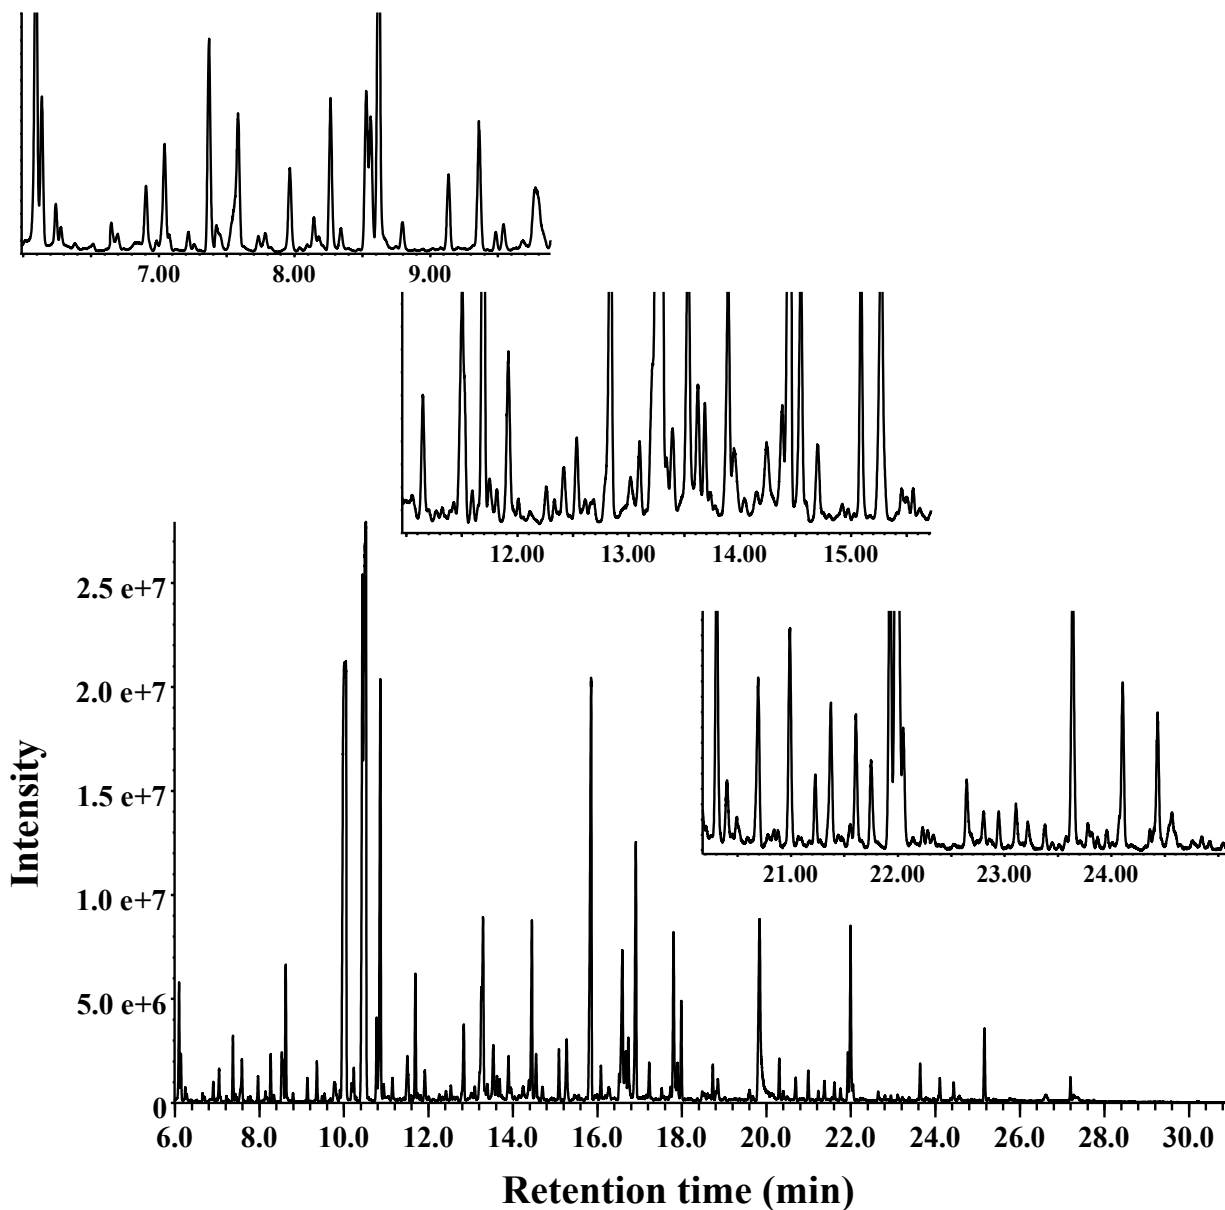

**Supplemental Figure S1. Representative GC-MS chromatogram from analysis of *S. Typhimurium* metabolites.** Cells were grown in LPM media for 20 h, isolated, and their metabolites extracted and chemically derivatized prior to analysis by GC-MS. The complete total ion chromatogram is shown, as well as select enlarged regions presented as insets.

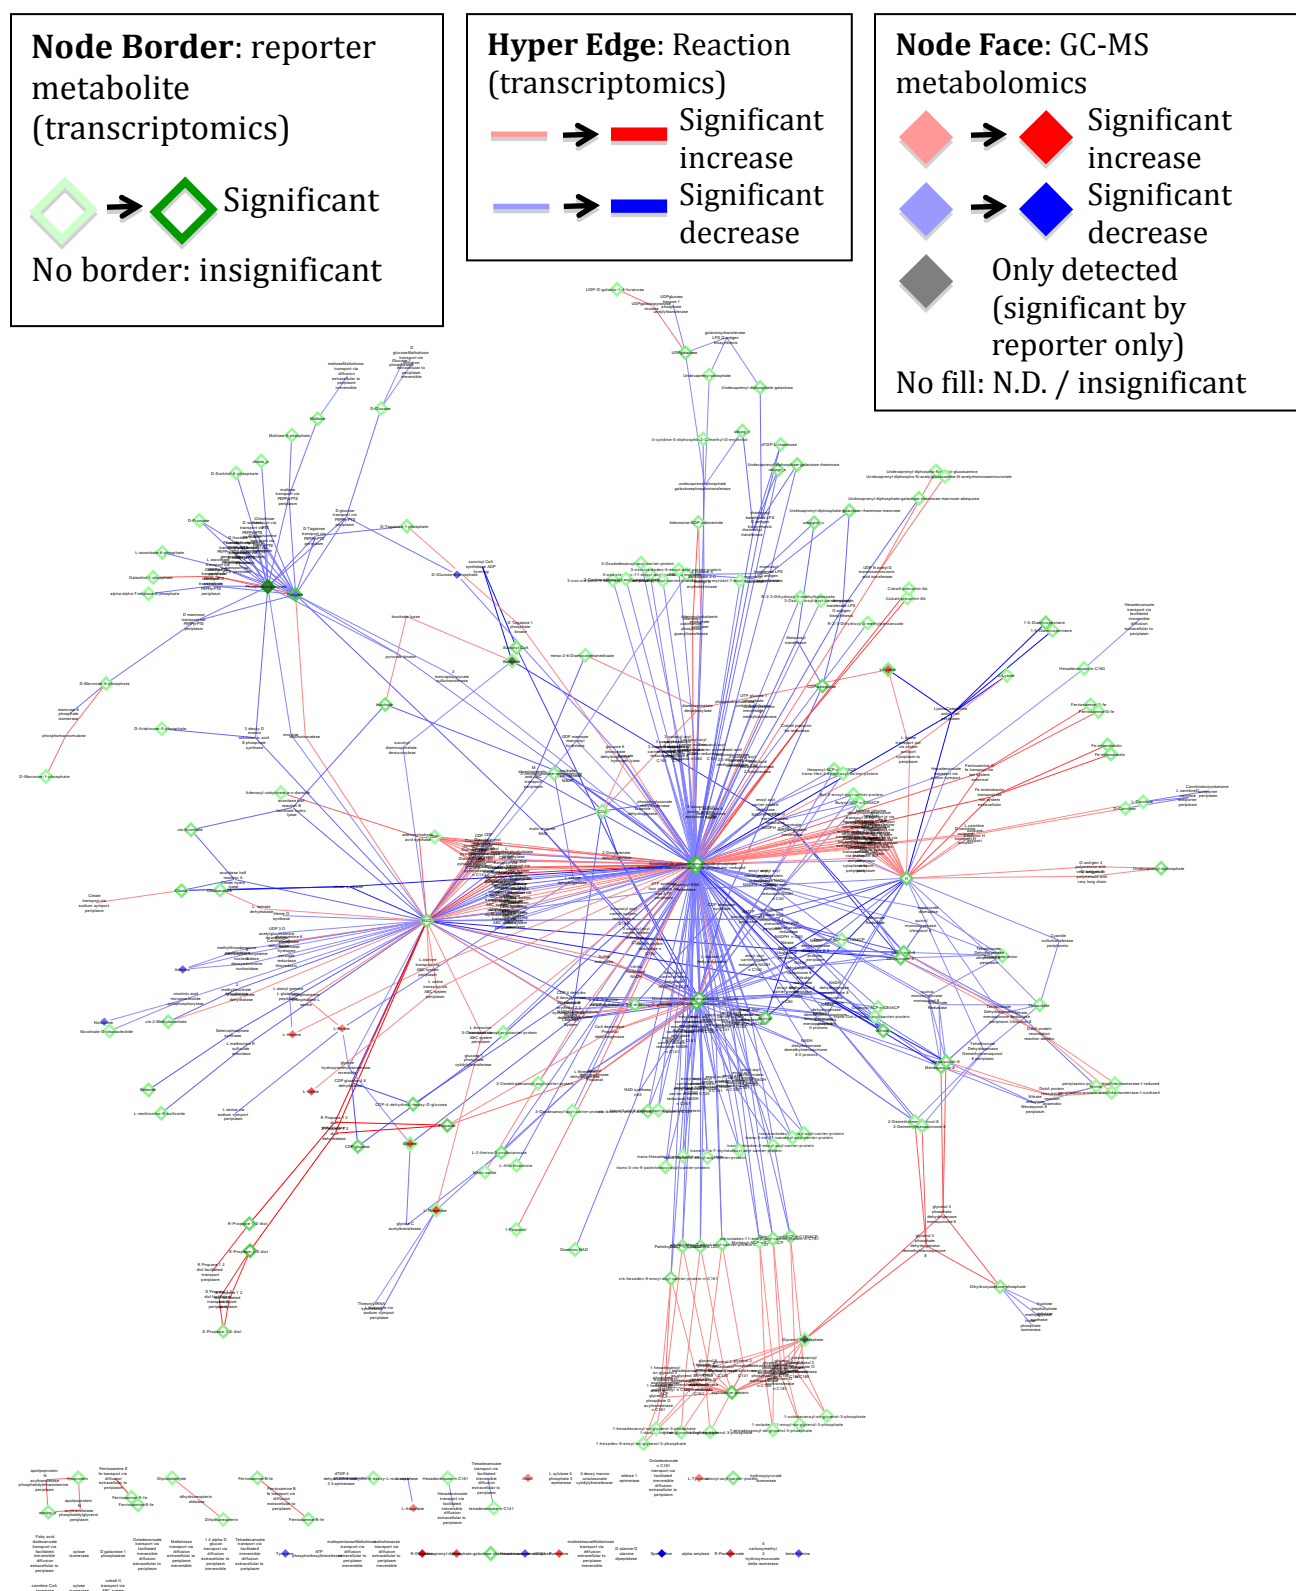

**Supplemental Figure S2. Reporter metabolite network based on alterations in gene expression and metabolomics data in LB and LPM 4 h.** Metabolite nodes were included in the network if they were significantly altered by reporter metabolite analysis (154,  $p \leq 0.05$ ) or metabolomics (23, two-tailed  $p \leq 0.05$ ). Hyper edges were included if an associated reaction was significantly altered (two-tailed  $p \leq 0.025$ ).

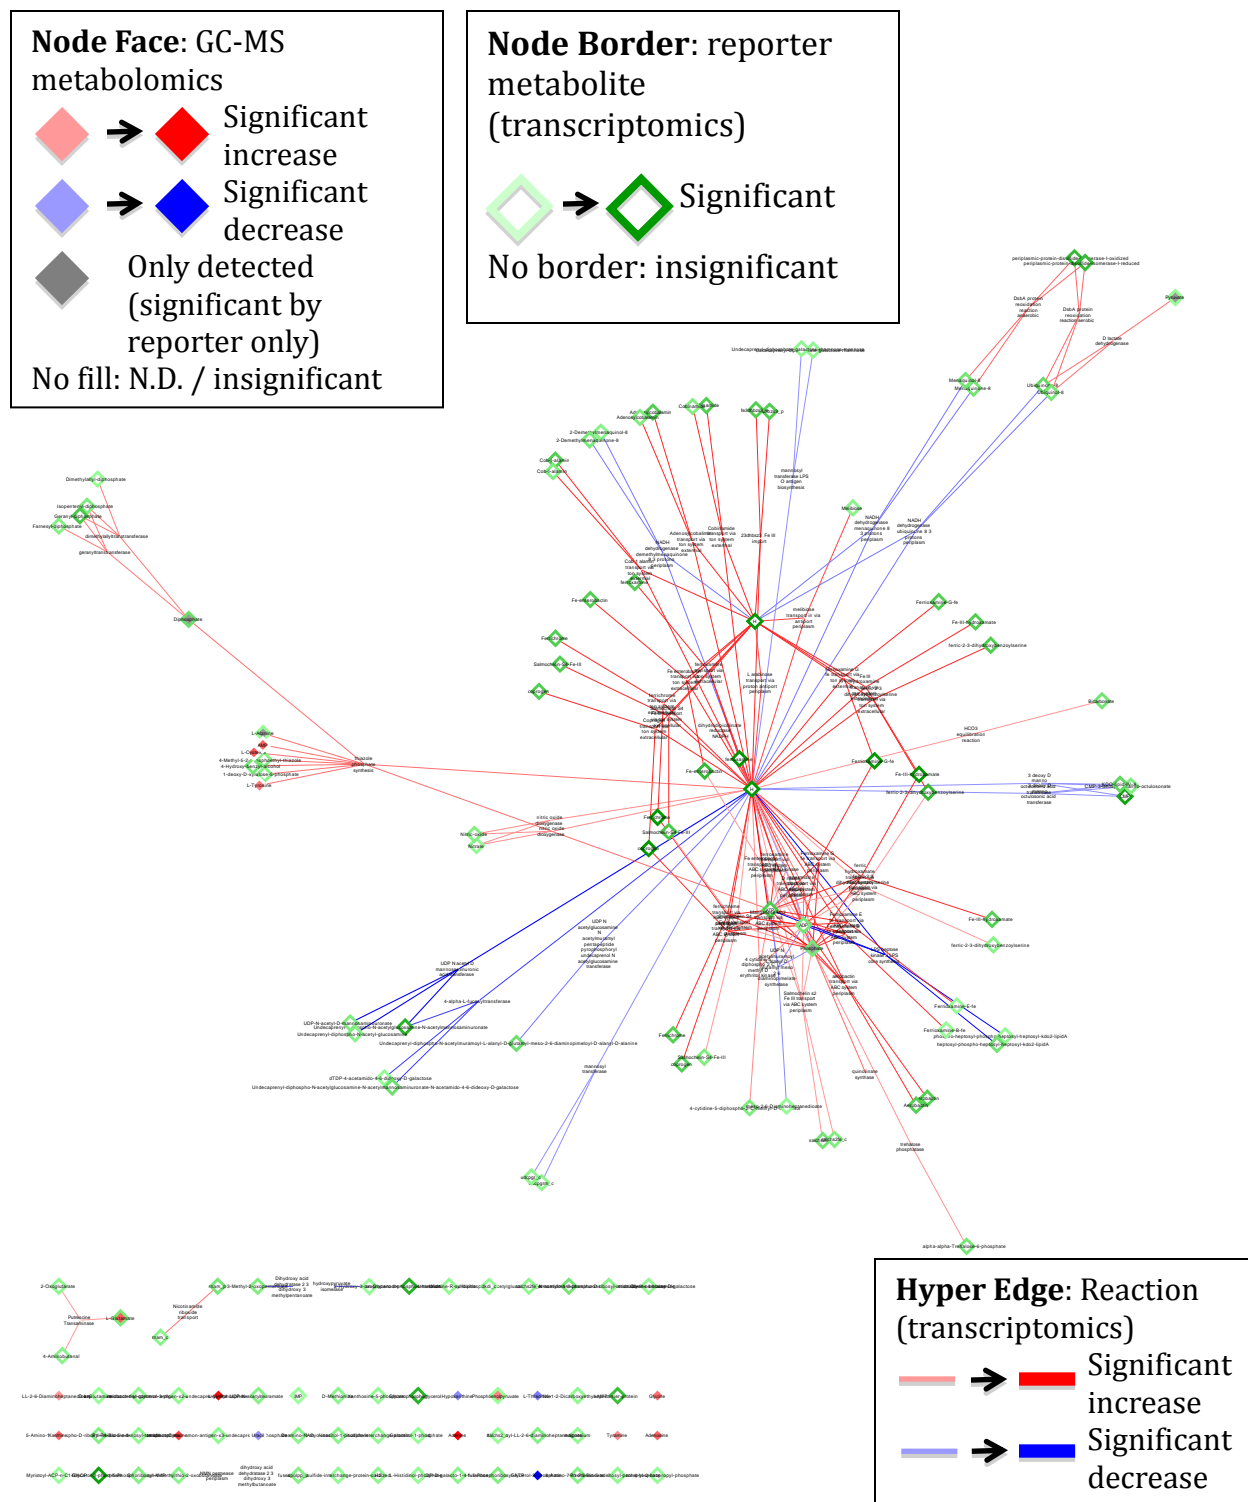

**Supplemental Figure S3. Reporter metabolite network based on alterations in gene expression and metabolomics data in LPM at 4 h and 20 h.** Metabolite nodes were included in the network if they were significantly altered by reporter metabolite analysis (131,  $p \leq 0.05$ ) or metabolomics (19, two-tailed  $p \leq 0.05$ ). Hyper edges were included if an associated reaction was significantly altered (two-tailed  $p \leq 0.025$ ).
