# Supplementary material for: Salmonella modulates metabolism during growth under conditions that induce expression of virulence genes
Source: Royal Society of Chemistry journal article supplement (doi:10.1039/c3mb25598k), 2013-03-22
Supplement: c3mb25598k.xlsx [file c3mb25598k.xlsx]

## Sheet: Sheet1
Metabolite	Pubchem	CAS	KEGG	LB_1_1	LB_1_2	LB_2_1	LB_2_2	LB_3_1	LB_3_2	LPM4H_1_1	LPM4H_1_2	LPM4H_2_1	LPM4H_2_2	LPM4H_3_1	LPM4H_3_2	LPM20H_1_1	LPM20H_1_2	LPM20H_2_1	LPM20H_2_2	LPM20H_3_1	LPM20H_3_2
phosphoric acid	1004	7664-38-2	C00009	-0.043166	0.408612	-1.43642	1.14385	-0.141321	1.83324	0.293377	-0.62196	-0.800433	0.865359	0.283289	1.31864	-2.06839	-1.03327	-0.468019	-0.556149	0.51408	0.508678
phosphoenolpyruvic acid	1005	138-08-9	C00074	1.08912	0.870653	-0.249342	-0.727559	-1.46686	-1.29627	-1.22039	-0.567014	-0.70981	-0.893604	-0.0079827	-0.57817	1.07108	0.215022	1.48175	0.475527	1.7096	0.804248
pyrophosphate	1023	14000-31-8	C00013	-0.317247	0.445403	-0.709245	-0.759697	-0.572708	-0.971143	-0.970805	-0.254526	-1.06516	-0.221878	-0.303365	-0.583311	2.84498	0.891225	1.51187	0.551667	0.497894	-0.013948
putrescine	1045	110-60-1	C00134	-1.32476	-1.41795	-1.19433	-1.44868	-1.23558	-1.16739	-0.143591	0.0420046	0.742534	0.675953	0.385368	0.356296	1.0316	1.06024	0.984338	0.840584	0.960706	0.852653
pyruvic acid	1060	127-17-3	C00022	1.57195	0.847018	1.4834	0.725888	1.60207	0.878896	0.0999335	0.592089	-0.418076	-0.953336	-0.286701	-0.475179	-0.672566	-0.501281	-0.76645	-1.04798	-1.25846	-1.42121
L-(+) lactic acid	107689	79-33-4	C00186	-0.150173	-0.651626	-0.908656	-0.238657	-0.836049	-0.589146	-0.520137	-0.462708	-1.20802	2.32671	1.38425	2.21216	-0.154554	-0.109383	0.149888	0.323461	-0.541461	-0.0258967
myristic acid	11005	544-63-8	C06424	0.703489	-0.0477588	0.648106	-0.00238565			-1.2285	-1.71859	-0.79516	-1.01303	0.356842	-0.751596	1.5116	0.753963	1.7967	0.800856	-0.381262	-0.633279
spermidine	1102	124-20-9	C00315	1.77485	1.59339	1.439	1.17958	0.981874	1.13848	-0.842766	-0.781895	-0.625249	-0.69601	-0.737807	-0.795458	-0.558117	-0.596148	-0.5334	-0.696696	-0.574412	-0.669215
succinic acid	1110	110-15-6	C00042	-2.04203	-2.05195	-0.924342	-0.523994	-0.349213	0.30062	0.864097	0.565897	0.629506	1.6582	0.478129	1.3977	-0.316788	-0.0509775	-0.545944	0.147911	0.090712	0.67246
thymine	1135	65-71-4	C00178	-0.621738	-0.974271	-0.729467	-1.02558	-1.74721	-1.697	-0.592202	-0.342905	1.60824	1.23298	0.687376	-0.0172587	0.647997	0.654189	0.728011	0.441059	0.86326	0.884523
uracil	1174	66-22-8	C00106	-0.70258	-1.0989	0.24272	-0.161186	-1.77228	-1.57625	0.287753	0.636346	1.8338	1.46442	1.37727	0.890454	-0.20051	-0.359529	0.112748	-0.800628	0.09374	-0.267395
urea	1176	57-13-6	C00086	-1.2389	-1.21592	-0.836295	-0.864971	-1.26832	-1.00688	0.517661	0.858762			1.18286	1.07532	0.528919	0.429512	1.23685	0.601403
urocanic acid	1178	104-98-3	C00785	-1.20458	-1.20458	-1.20458	-1.20458	-1.20458	-1.20458	-0.230739	-0.0651132	0.206602	1.09362	-0.039657	0.787965	0.285127	0.671785	0.551109	1.50156	0.882268	1.58298
xanthine	1188	69-89-6	C00385	0.0836095	-0.677329	-0.786316	-1.23313	-1.00444	-0.902319	-0.673282	-0.0177403	-0.0866739	-0.385758	-0.738812	-1.03658	1.26801	0.900914	1.66072	0.705055	1.9049	1.01917
L-homoserine	12647	672-15-1	C00263	-0.86774	-0.882538	-0.544903	-0.525522	-0.700831	-0.875215	2.13614	2.45925	-0.507258	-0.608046			0.306964	0.168669	0.341578	0.351377	-0.0745798	-0.177354
adenosine	60961	58-61-7	C00212	-0.538164	-0.388669	0.886881	0.597865	-0.815358	-0.690082	-1.12573	-0.753885	-1.00145	-1.05696			1.63339	1.35916			0.870358	1.02264
2'-deoxycytidine 5'-monophosphoric acid	13945	1032-65-1	C00239	-0.217562	-0.617006	0.0853471	-0.0851207	-0.666667	-0.688584	-1.34832	-1.26023			-1.06543	-0.958489	1.0104	0.765412	1.07015	1.08004	1.26522	1.63083
adenine	190	73-24-5	C00147	1.01308	1.16538	1.18574	0.863786	-0.481069	-0.141963	-1.44992	-1.35967	-1.03831	-1.27649	-1.04711	-1.29481	0.819754	0.517844	0.774582	0.218729	0.868515	0.661924
Beta- alanine	239	107-95-9	C00099	1.30774	-3.29981	1.79328	1.13833	0.936196	1.42189	-0.66917	-0.527105	-0.166241	-0.0926149	-1.35308	-0.62327	-1.09015	0.246146	-0.816562	-0.862059	-1.04033	0.397004
L-glutamic acid	33032	56-86-0	C00025	-0.903396	-0.891421	-0.59853	-0.675493	-0.873052	-0.834049	-0.904141	-0.809899	0.155738	-0.00474758	-0.72379	-0.725843	1.23566	1.1712	1.11803	0.942358	1.7504	1.57097
1,3-diaminopropane	428	109-76-2	C00986	0.522599	0.487914	1.33967	2.25346	1.11071	1.79933	-0.452392	-0.521956	-0.38907	-0.443897	-0.419251	-0.396663	-0.815077	-0.815077	-0.815077	-0.815077	-0.815077	-0.815077
glyceric acid	439194	473-81-4	C00258	-0.889317	-0.901265	-0.890481	-0.892447	-0.933058	-0.929833	-0.218251	-0.151919	-0.168816	-0.211665	-0.245523	-0.327372	0.395238	0.325666	0.948455	0.560335	2.37316	2.1571
6-deoxy-D-glucose	439746	7658-08-4	C02522	-1.31197	-1.37122	-0.335462	-0.47662					-0.243624	-0.180739	-0.376362	-0.694705	0.582572	0.415723	0.309864	-0.234098	2.02702	1.88962
citramalic acid	441696	597-44-4	C00815	-1.14343	-1.19408	0.0581702	0.457647	-0.477196	-0.133603	-1.10488	1.11579	-0.945271	-0.475236	1.38028	2.84114	-0.138628	0.0552051	-0.405231	0.00469884	-0.111993	0.216624
D-glucose-6-phosphate	439958	56-73-5	C00668	0.844771	0.916648	1.28693	2.26249	0.60055	1.57481	-0.684341	-0.421127	-0.616198	-0.0628988	-0.674599	-0.0254276	-0.811359	-0.630827	-0.902082	-0.607363	-1.07613	-0.973854
palmitoleic acid	5282745	373-49-9	C08362	2.04136	1.55052	0.682306	0.400752	1.41181	1.48597	-0.431485	-0.591	-0.111378	-0.299303	-0.583212	-0.613577	-1.06026	-1.01784	-0.632706	-0.65595	-0.873395	-0.702609
oleic acid	965	112-80-1	C00712	-0.109705	0.0932731	0.600164	0.976913	1.81508	2.67764	-1.08134	0.11102	-0.809592	0.130615	-0.881319	-0.447263	-0.608832	-0.42508	-0.698675	0.229701	-0.929013	-0.643586
4-guanidinobutyric acid	500	463-00-3	C01035	-0.793826	-1.11337	-0.521873	-0.691152	0.13717	0.201112	-1.2393	-1.03448	0.936733	2.21041	-0.534987	-0.536911	1.23041	1.32354	0.314267	0.112258
stearic acid	5281	57-11-4	C01530	-1.38562	-1.57306	-0.0506813	1.23772	-1.18292	-0.571169	-0.819324	1.20009	-0.627709	1.05447	0.260012	1.83838	-0.54899	0.226743	0.314733	1.22427	-0.574078	-0.0228662
tyramine	5610	51-67-2	C00483	0.42614	-0.032461	0.514565	-0.00521385	0.703035	1.01849	-1.57991	-1.31802	-0.48694	-0.788394	-1.23816	-1.56209	0.241218	-0.14228	1.29609	0.106736	1.68142	1.16576
L-cysteine	5862	52-90-4	C00097	-0.837881	-0.815349	-0.883296	-0.865937	-0.832846	-0.828105	-0.308923	-0.204648	-0.683326	-0.717114	-0.458281	-0.358925	0.82859	0.699092	1.46765	1.18397	1.80819	1.80714
L-alanine	5950	56-41-7	C00041	-1.5188	-1.09845	-1.20699	-1.3243	-1.11305	-1.05079	-0.502725	-0.127872	0.957584	0.750412	0.237828	0.303284	0.9364	1.02276	0.733165	0.45636	1.52522	1.01997
L-serine	5951	56-45-1	C00065	-0.957575	-0.936688	-0.856304	-0.83691	-0.896584	-0.862872	-0.573183	-0.300019	-0.0337326	-0.0308184	-0.676748	-0.470551	0.412331	0.813631	1.13575	2.16391	1.23453	1.67184
L-aspartic acid	5960	56-84-8	C00049	-1.12514	-1.16895	-1.05949	-1.11974	-1.10577	-1.09669	-0.636454	-0.561223	0.608422	0.661929	0.441583	0.0404325	0.91107	0.51033	0.955155	0.376346	1.57467	1.79353
L-lysine	5962	56-87-1	C00047	-0.860879	-0.873994	-0.827659	-0.838961	-0.86493	-0.855571	-0.504515	-0.394047	-0.373844	-0.463719	-0.573164	-0.598944	1.23171	1.0106	1.85655	1.38549	1.39265	1.15323
cytosine	597	71-30-7	C00380	-0.461086	-0.462292	-0.59404	-0.599693	-0.844571	-0.868562	-0.850369	-0.888169			-0.824629	-0.888749	0.961455	0.976755	1.23514	0.86618	1.62074	1.62189
fructose	439709	53188-23-1	C02336	0.50399	0.162073	2.60072	2.15877			-0.124388	0.116485	-0.578104	-0.306562	-0.374673	-0.62456	-0.438447	-0.294896	-0.878915	-0.510001	-0.701159	-0.710336
L-tyrosine	6057	60-18-4	C00082	-0.949907	-1.02975	-1.00358	-1.06496	-1.11722	-1.08058	-0.71175	-0.511749	0.434481	0.155356	-0.118463	-0.296006	1.05255	0.842524	1.67119	1.0018	1.54639	1.17967
L-leucine	6106	61-90-5	C00123	-1.04345	-0.644748	-1.14555	-1.01958	-1.09357	-1.10286	-0.821358	-0.752189	0.693669	0.648819	-0.262059	-0.330236	0.829412	0.752103	1.36389	0.992859	1.41749	1.51736
L-methionine	6137	63-68-3	C00073	-1.05071	-1.00418	-1.22326	-1.27329	-1.05526	-1.0437	-0.605653	-0.410312	1.26918	1.03234	-0.228767	-0.211816	0.708069	0.457893	1.1506	0.848761	1.41432	1.22579
L-proline	145742	147-85-3	C00148			-1.30312	-1.32283	-1.09193	-1.12808			0.579314	0.272413	-0.611331	-0.556025	0.233625	1.58366	0.421182	0.913675	1.45233	0.557118
D-glucose	5793	50-99-7	C00031	-0.954279	-0.941258	-0.942873	-0.817946	-0.964677	-0.835513	-0.436887	0.876581	0.129953	0.960107	1.41575	2.81065	-0.066582	0.0651221	-0.327153	0.0231277	-0.218809	0.224684
L-ornithine	6262	70-26-8	C00077	-0.853541	-0.897734	-1.1562	-1.18494	-1.05357	-0.991231	-0.693938	-0.529031	1.16588	0.758895	-0.465463	-0.509745	1.14528	0.820782	1.70688	1.08925	0.911004	0.737426
L-histidine	6274	71-00-1	C00135	-0.793453	-0.770319	-0.769298	-0.779907	-0.759635	-0.757161	-0.641359	-0.627976	-0.252344	-0.00986188	-0.620004	-0.396917	0.343575	1.03341	0.329822	1.28046	1.70899	2.48198
L-valine	1182	72-18-4	C00183	-1.16723	-1.06371	-1.16559	-1.16905	-1.19704	-1.18814	0.283466	0.364317	1.47384	1.39892	1.59749	1.36594	-0.173434	-0.0520932	0.152981	0.0566254	0.253512	0.229206
L-threonine	6288	72-19-5	C00188	-0.597776	-1.34448	-0.591271	-1.07509	-1.02644	-0.830669	1.11543	1.25398	1.07819	0.904016	1.73981	0.828774	0.144943	-0.241195			-0.486458	-0.871768
pantothenic acid	6613	79-83-4	C00864	-1.06681	-1.33936	-0.822945	-0.984929	-1.1778	-1.21148	0.407814	0.434707	0.838606	0.624298	0.624603	0.173785	1.52084	2.30978	-0.107722	-0.189085	-0.0415146	0.00722329
dihydroxyacetone phosphate	668	57-04-5	C00111	0.794777	2.01438	2.48866	0.956878	0.403475	0.713967	-0.614345	-0.614345	-0.614345	-0.614345	-0.614345	-0.614345	-0.614345	-0.614345	-0.614345	-0.614345	-0.614345	-0.614345
porphine	66868	101-60-0	C05113	-0.749514	-0.958386	-1.10181	1.76068	-0.668306	-0.247523	-0.43177	0.736652	-1.28784	1.68968	0.153494	-0.730356	-0.193736	-0.685803	0.37395	2.05125	0.121537	0.167791
adenosine-5'-monophosphate	6083	61-19-8	C00020	0.491146	0.604529	0.988035	0.937754	-0.673677	-0.511872	-0.914508	-0.870162	-1.38391	-1.50041	-1.04212	-1.08094	0.341382	0.138495	1.53313	1.44286	0.511378	0.9889
N-acetyl-L-glutamic acid	185	1188-37-0	C00624	-1.19644	-1.22506			-1.20312	-1.13638	-0.651272	-0.621113	-0.569852	-0.454817	0.609995	0.305047	0.851575	0.781201	1.96191	1.13588	0.864274	0.548167
glycine	750	56-40-6	C00037	-1.22265	-1.40972	-0.876828	-1.00329	-1.46309	-1.41133	-0.254167	-0.116214	0.46477	0.345681	0.328056	0.171322	0.995822	0.893208	1.31126	0.946302	1.21359	1.08727
DL-glyceraldehyde	751	56-82-6	C02154	2.00236	1.27448	-0.538982	-0.625997	0.459118	0.563807	0.752021	1.02275	-0.755657	-0.798429	1.06926	1.04242	-0.793105	-0.754928	-1.1333	-0.784937	-0.955673	-1.04521
glycerol	753	56-81-5	C00116	2.66397	1.38285	1.0375	0.729692	-1.00155	-1.19778			-0.138355	-0.460034	-0.195949	-0.876422	-0.105037	-0.222917	-0.0635106	-0.628516	-0.360923	-0.563015
glycerol 3-phosphate	439162	57-03-4	C00093	2.24881	1.95071	1.58396	1.35938	-0.308412	-0.288995	-0.480903	-0.473484	-0.482922	-0.501885	-0.508161	-0.52812	-0.590538	-0.595127	-0.587474	-0.604315	-0.603934	-0.588589
glycolic acid	757	79-14-1	C00160	0.399885	0.527619	0.86379	2.23345	0.767419	2.1671	-0.771157	-0.595587	-1.04213	-0.112741	-0.0346947	-0.333707	-0.987884	-0.632343	-0.868709	-0.10759	-1.01461	-0.458114
hypoxanthine	790	68-94-0	C00262	-0.492434	-0.774526	1.08632	0.609201	-1.1673	-0.827939	0.00988461	0.548679	2.02491	1.45919	1.32521	0.601679	-0.849854	-0.967555	-0.23689	-1.2554	-0.443074	-0.6501
L-isoleucine	791	73-32-5	C00407	-1.18855	-1.3448	-1.05797	-0.87961	-0.978957	-0.263292	-0.522032	-0.390938	0.463655	2.53015	-0.29529	0.36096	0.0304122	0.471533	0.217414	1.35993	0.312052	1.17532
2,6-diaminopimelic acid	865	583-93-7	C00666			-0.410655	-0.410073	-0.98228	-0.423587	-1.31548	-1.19708	-0.460021	-0.672076			0.892869	0.720513	0.639591	0.199771	1.91382	1.50468
malonic acid	867	141-82-2	C00383	1.54192	1.65798	1.98823	0.853536	0.889293	0.759384	-0.516622	-0.15609	-0.759063	-0.62238	-0.600355	-0.142573	-0.922201	-0.473375	-1.02139	-0.894379	-0.690926	-0.890989
D-malic acid	222656	97-67-6	C00149	-1.14616	-1.11792	-0.847531	-0.874828	-0.433191	-0.364619	-0.0199672	0.0948531	2.21961	2.01028	1.25273	0.985911	-0.343178	-0.348399	-0.578769	-0.71215	0.17277	0.0505501
4-hydroxyphenyllactic acid	9378	306-23-0	X	-1.22461	-1.24118	-0.964184	-0.894981	-1.08722	-1.02635	-0.144098	-0.459094	0.910784	1.8975	0.866809	0.17638	0.775845	0.840701			0.750126	0.82357
nicotinic acid	938	59-67-6	C00253	0.286367	-0.108544	1.49262	1.06571	1.20647	1.41792	-1.84943	-1.73228	-0.303932	-0.50471	-0.965959	-1.24047	0.220169	-0.000405641	0.325558	-0.358613	0.560379	0.489145
citrulline	9750	372-75-8	C00327	0.070415	-0.422792	-0.274264	1.75448	0.0383067	1.40695	-0.728252	-0.49342	-1.15611	-0.438308	-1.34952	-1.1219	-0.593085	-0.398549	0.466328	2.20508	0.222498	0.812138
palmitic acid	985	57-10-3	C00249	-0.727371	-0.530263	0.542858	1.09765	0.0864446	0.730649	-1.76431	1.51851	-0.508768	1.78285	-0.516257	1.02351	-0.911332	0.0865589	-0.634191	0.733507	-1.30532	-0.704733
D-ribose	5779	50-69-1	C00121	-0.545108	-0.553886	-0.724359	-0.534368	-1.03475	-1.02376	0.927539	2.42349	-0.363296	0.0734498	-0.963442	-0.894832	-0.397705	-0.184283	0.204171	1.06497	0.87047	1.65571
