# Supplementary material for: Salmonella modulates metabolism during growth under conditions that induce expression of virulence genes
Source: Royal Society of Chemistry journal article supplement (doi:10.1039/c3mb25598k), 2013-03-22
Supplement: c3mb25598k_3.pdf [file c3mb25598k_3.pdf]

**Supplemental Table S2. Characterization of the absolute relative reaction and metabolite turnover flux range change upon the change to LPM from LB.**

| Change | Number of Reactions | Percent of Reactions | Number of Metabolites | Percent of metabolites |
|--------|---------------------|----------------------|-----------------------|------------------------|
| ≤ 1    | 1240                | 78%                  | 1130                  | 81%                    |
| > 1    | 347                 | 22%                  | 267                   | 19%                    |

**Supplemental Table S3. Pathway enrichment analysis of reactions with exclusive flux ranges when changing from LB to LPM.**

| KEGG ID | Pathway Name                           | <i>p</i> -value |
|---------|----------------------------------------|-----------------|
| 1100    | metabolic pathways                     | 1.4E-8          |
| 620     | pyruvate metabolism                    | 0.00013         |
| 10      | glycolysis / gluconeogenesis           | 0.00054         |
| 680     | methane metabolism                     | 0.0035          |
| 473     | D-alanine metabolism                   | 0.0038          |
| 790     | folate biosynthesis                    | 0.015           |
| 471     | D-glutamine and D-glutamate metabolism | 0.015           |
| 910     | nitrogen metabolism                    | 0.033           |

**Supplemental Table S4. Pathway enrichment analysis of metabolites with exclusive turnover flux ranges when changing from LB to LPM.**

| KEGG ID | Pathway Name                                 | <i>p</i> -value |
|---------|----------------------------------------------|-----------------|
| 01100   | metabolic pathways                           | 9.5E-14         |
| 00061   | fatty acid biosynthesis                      | 8.4E-11         |
| 00550   | peptidoglycan biosynthesis                   | 4.1E-7          |
| 00790   | folate biosynthesis                          | 3.8E-5          |
| 00680   | methane metabolism                           | 4.2E-5          |
| 01120   | microbial metabolism in diverse environments | 0.0011          |
| 00270   | cysteine and methionine metabolism           | 0.0016          |
| 00010   | glycolysis / gluconeogenesis                 | 0.018           |
| 00910   | nitrogen metabolism                          | 0.033           |

**Supplemental Table S5. Metabolites with putative modulatory influence on macrophage activation that were detected intracellularly in *Salmonella* in this study.**

| Detected Metabolite | Role                        | Evidence                               | GC-MS Ratio<br>(LPM 4h Mean : LB Mean) | Relative Flux Range<br>Change<br>(LB to LPM 4h) |
|---------------------|-----------------------------|----------------------------------------|----------------------------------------|-------------------------------------------------|
| Glucose             | Immunoactivating            | Exp <sup>1,2</sup><br>Sim <sup>3</sup> | 6.96                                   | -0.52                                           |
| L-Histidine         | Immunoactivating            | Sim <sup>3</sup>                       | 7.99                                   | -7.38                                           |
| L-Lysine            | Immunoactivating            | Sim <sup>3</sup>                       | 6.65                                   | -1.00                                           |
| L-Valine            | Immunoactivating            | Exp <sup>4</sup><br>Sim <sup>3</sup>   | 9.79                                   | †                                               |
| L-Isoleucine        | Immunoactivating            | Exp <sup>4</sup><br>Sim <sup>3</sup>   | 3.01                                   | -0.30                                           |
| L-Serine            | Immunoactivating            | Sim <sup>3</sup>                       | 3.68                                   | †                                               |
| Glycine             | Immunoactivating            | Sim <sup>3</sup>                       | 2.19                                   | -4.40                                           |
| L-Leucine           | Immunoactivating            | Exp <sup>4</sup><br>Sim <sup>3</sup>   | 2.35                                   | †                                               |
| Pyruvate            | Neutral                     | Sim <sup>3</sup>                       | 0.71                                   | †                                               |
| L-cysteine*         | Weakly<br>Immunosuppressive | Exp <sup>5</sup> ,<br>Sim <sup>3</sup> | 5.78                                   | 0.09                                            |
| Oleic acid          | Immunosuppressive           | Sim <sup>3</sup>                       | 0.45                                   | 0.02                                            |
| L-tyrosine          | Immunosuppressive           | Sim <sup>3</sup>                       | 2.32                                   | -4.52                                           |
| Myristic acid       | Immunosuppressive           | Sim <sup>3</sup>                       | 0.69                                   | 0.04                                            |
| L-Methionine        | Immunosuppressive           | Sim <sup>3</sup>                       | 2.79                                   | -1.06                                           |
| Stearic acid        | Immunosuppressive           | Sim <sup>3</sup>                       | 1.44                                   | 0.02                                            |
| Phosphate           | Immunosuppressive           | Sim <sup>3</sup>                       | 0.99                                   | †                                               |
| L-Threonine         | Immunosuppressive           | Sim <sup>3</sup> **                    | 2.03                                   | †                                               |

\* Previous evaluations with the macrophage were performed with L-cystine. Simulation suggested a weak suppression of M2 activation and NADH production but enhancement of NO and ATP production.

\*\* Threonine appeared to support an immunosuppressive phenotype but results were not conclusive. See the discussion by Bordbar et al. for details.

† Not calculated (implicated by model loops)

**References**

1. P. Newsholme, L. F. Costa Rosa, E. A. Newsholme and R. Curi, *Cell biochemistry and function*, 1996, **14**, 1-10.
2. L. F. de Souza, F. R. Jardim, I. P. Sauter, M. M. de Souza and E. A. Bernard, *Clinica chimica acta; international journal of clinical chemistry*, 2008, **398**, 130-133.
3. A. Bordbar, M. L. Mo, E. S. Nakayasu, A. C. Schrimpe-Rutledge, Y. M. Kim, T. O. Metz, M. B. Jones, B. C. Frank, R. D. Smith, S. N. Peterson, D. R. Hyduke, J. N. Adkins and B. O. Palsson, *Mol Syst Biol*, 2012, **8**, 558.

4. R. A. Bassit, L. A. Sawada, R. F. Bacurau, F. Navarro, E. Martins, Jr., R. V. Santos, E. C. Caperuto, P. Rogeri and L. F. Costa Rosa, *Nutrition*, 2002, **18**, 376-379.
5. H. Watanabe and S. Bannai, *J Exp Med*, 1987, **165**, 628-640.
